# Supplementary material for: Homoarginine and Progression of Chronic Kidney Disease: Results from the Mild to Moderate Kidney Disease Study
Source: PubMed Central journal article supplement (PMC3655120; doi:10.1371/journal.pone.0063560), 2013-05-15
Supplement: pone.0063560.s001.pdf [file pone.0063560.s001.pdf]

**Table S1.** Baseline clinical and laboratory data of 182 patients with homoarginine measurements available vs. 45 patients without measurements.

| <b>Variable</b>                          | <b>With homoarginine available (n=182)</b> | <b>Without homoarginine (n=45)</b> | <b>P-value</b> |
|------------------------------------------|--------------------------------------------|------------------------------------|----------------|
| Sex: males/females, n (%)                | 122/60<br>(67.0/33.0)                      | 32/13<br>(71.1/28.9)               | 0.60           |
| Age (years)                              | 45.8±12.8                                  | 45.0±11.6                          | 0.52           |
| BMI (kg/m <sup>2</sup> )                 | 25.1±3.6                                   | 25.2±4.5                           |                |
| Current smokers, n (%)                   | 36 (20)                                    | 13 (29)                            | 0.36           |
| Systolic blood pressure (mmHg)           | 137.0±20.7<br>(120;135;150)                | 138.5±21.2<br>(120;140;155)        | 0.67           |
| Diastolic blood pressure (mmHg)          | 85.5±13.0                                  | 91.4±16.3                          | 0.01           |
| Serum albumin (g/dL)                     | 4.6±0.4                                    | 4.6±0.4                            | 0.73           |
| Proteinuria (g/24h/1.73 m <sup>2</sup> ) | 0.90±0.90<br>(0.18;0.55;1.26)              | 1.01±0.91<br>(0.17;0.81;1.63)      | 0.43           |
| GFR (mL/min/1.73m <sup>2</sup> )         | 69±43<br>(38;63;96)                        | 71±37<br>(39;69;93)                | 0.66           |
| Creatinine (μmol/L)                      | 179±113<br>(96;135;231)                    | 172±101<br>(105;129;193)           | 0.94           |
