# Supplementary material for: Homoarginine and Progression of Chronic Kidney Disease: Results from the Mild to Moderate Kidney Disease Study
Source: PubMed Central journal article supplement (PMC3655120; doi:10.1371/journal.pone.0063560), 2013-05-15
Supplement: pone.0063560.s002.pdf [file pone.0063560.s002.pdf]

**Table S2.** Baseline clinical and laboratory data of the 177 patients who completed the follow-up. The patient group is stratified to 139 patients with homoarginine measurements available vs. 38 patients without measurements.

| <b>Variable</b>                          | <b>With homoarginine available (n=139)</b> | <b>Without homoarginine (n=38)</b> | <b>P-value</b> |
|------------------------------------------|--------------------------------------------|------------------------------------|----------------|
| Sex: males/females, n (%)                | 90/49<br>(64.7/35.3)                       | 28/10<br>(73.7/26.3)               | 0.30           |
| Age (years)                              | 46.6±12.5                                  | 45.6±11.3                          | 0.46           |
| BMI (kg/m <sup>2</sup> )                 | 25.3±3.6                                   | 24.8±3.9                           | 0.49           |
| Current smokers, n (%)                   | 22 (16)                                    | 12 (32)                            | 0.08           |
| Systolic blood pressure (mmHg)           | 136.2±20.2                                 | 138.5±19.9                         | 0.53           |
| Diastolic blood pressure (mmHg)          | 85.4±12.5                                  | 91.0±14.9                          | 0.02           |
| Serum albumin (g/dL)                     | 4.6±0.4                                    | 4.6±0.3                            | 0.82           |
| Proteinuria (g/24h/1.73 m <sup>2</sup> ) | 1.00±0.92<br>(0.24;0.69;1.54)              | 1.04±0.92<br>(0.16;0.84;1.77)      | 0.87           |
| GFR (mL/min/1.73m <sup>2</sup> )         | 62±41<br>(34;52;87)                        | 69±34<br>(39;70;92)                | 0.15           |
| Creatinine (µmol/L)                      | 195±118<br>(105;157;253)                   | 174±106<br>(105;132;189)           | 0.41           |
